# Supplementary material for: IGF signalling and endocytosis in the human villous placenta in early pregnancy as revealed by comparing quantum dot conjugates with a soluble ligand
Source: Royal Society of Chemistry journal article supplement (doi:10.1039/c8nr10337b), 2019-01-01

# Supplementary Figure 1. Effect of internalisation inhibitors on IGF-I-mediated signalling.

Western blot analysis of signalling molecule activation in first trimester placental explants (n=4-9) treated with CPMZ (100  $\mu$ M; clathrin-mediated endocytosis inhibitor),  $\beta$ MCD (10 $\mu$ M), filipin (10 $\mu$ g/ml) (both inhibitors of caveolin-mediated endocytosis, cytochalasin D (10 $\mu$ M, actin polymerization inhibitor) or vehicle (DMSO 1/1000) for 30 min prior to treatment with IGF-I (20nM) for 30 min.

Figure 1 Supp

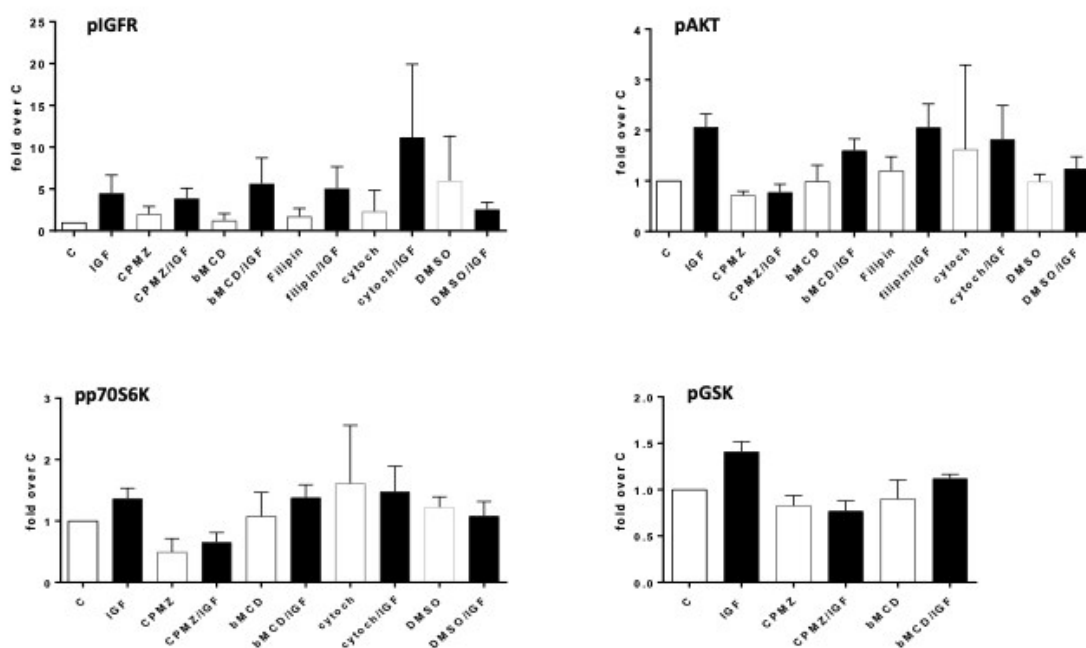

Supplement: c8nr10337b1.pdf [file c8nr10337b1.pdf]
